# Supplementary material for: Curcumin Derivative GT863 Inhibits Amyloid-Beta Production via Inhibition of Protein N-Glycosylation
Source: MDPI journal article supplement (doi:10.3390/cells9020349), 2020-02-03
Supplement: s1 [file s1]

## Supplementary Figure S1

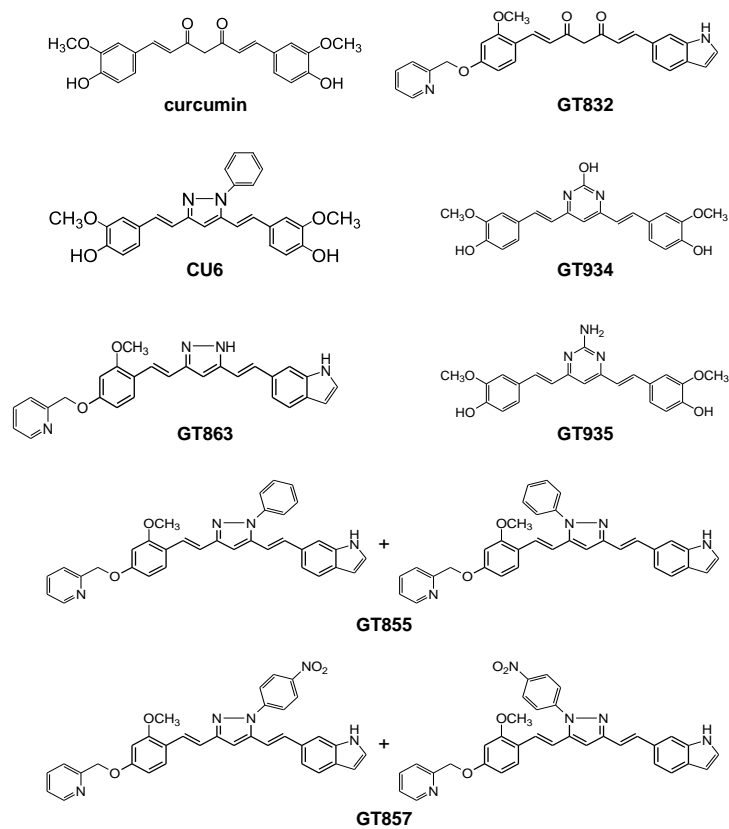

Supplementary Figure S1  
Chemical structural of curcumin derivatives

## Supplementary Figure S2

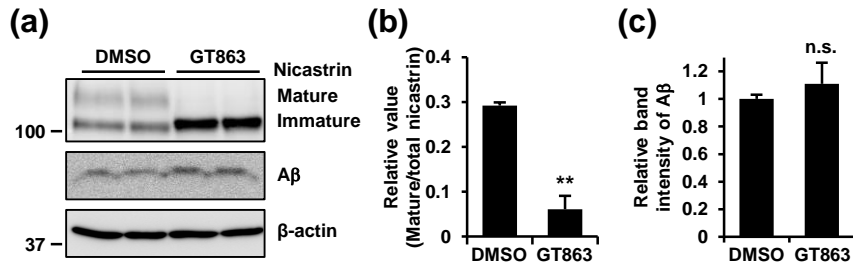

Supplementary Figure S2 Effect of kifunensine treatment on A $\beta$  production in CHO-APPswe cells. **(a-d)** CHO-APPswe cells were treated with 1  $\mu$ g/ml kifunensine (Kif) for 48 h. **(a)** Whole cell lysates were immunoblotted with appropriate antibodies as indicated. **(b-c)** Band intensities of nicastrin **(b)** and A $\beta$  **(c)** were quantified by densitometric scanning, relative value being shown, mean  $\pm$  S.D. n = 3, \*\*, p < 0.01, n.s. = not significant.
